# Supplementary material for: Switching the photoinduced processes in host–guest complexes of β-cyclodextrin-substituted silicon(iv) phthalocyanines and a tetrasulfonated porphyrin
Source: Royal Society of Chemistry journal article supplement (doi:10.1039/c1cp21930h), 2011-01-01
Supplement: c1cp21930h.pdf [file c1cp21930h.pdf]

## **Electronic Supplementary Information**

### **Switching the photoinduced processes in host-guest complexes of $\beta$ -cyclodextrin-substituted silicon(IV) phthalocyanines and a tetrasulfonated porphyrin**

**Eugeny A. Ermilov,\* Roel Menting, Janet T. F. Lau, Xuebing Leng, Beate Röder and  
Dennis K. P. Ng\***

#### **Contents**

- Fig. S1** (a) Change in absorption spectrum of **3** upon addition of TPPS in water. (b) Change in absorbance of the Q band at 677 nm vs. the concentration ratio of [TPPS]/[**3**]
- Fig. S2** Part of the ESI mass spectrum of an equimolar mixture of **3** and TPPS in water
- Fig. S3** Fluorescence spectra of a 1:1 mixture of **1** and TPPS in water upon Por- or Pc-part excitation
- Fig. S4** Stern-Volmer plots for the fluorescence quenching of **1-5** upon addition of TPPS in water.
- Fig. S5** DAF spectra of a 1:1 mixture of **1** and TPPS in water upon Por- or Por-part excitation
- Fig. S6** (a) Transient absorption spectra of **1** and its 1:1 mixture with TPPS in water and (b) recovery of the phthalocyanine ground state bleaching after photoexcitation of the complex

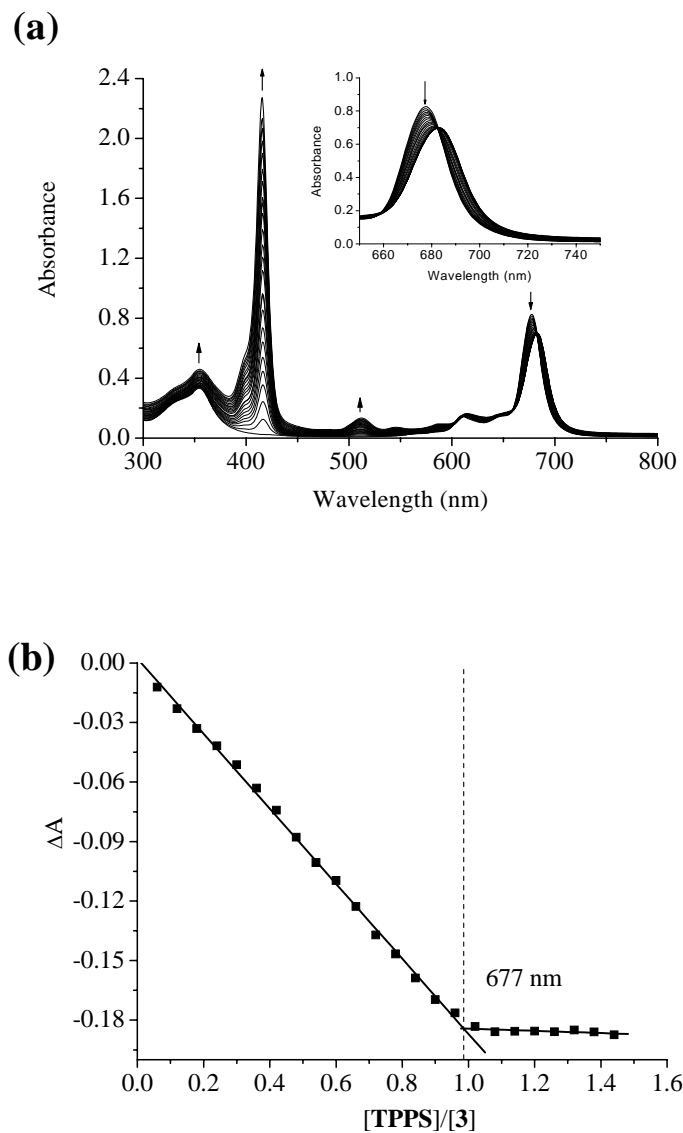

**Fig. S1** (a) Change in absorption spectrum of **3** (5  $\mu\text{M}$ ) upon addition of TPPS in water. The inset enlarges the Q-band region. (b) Change in absorbance of the Q band at 677 nm vs. the concentration ratio of [TPPS]/[**3**].

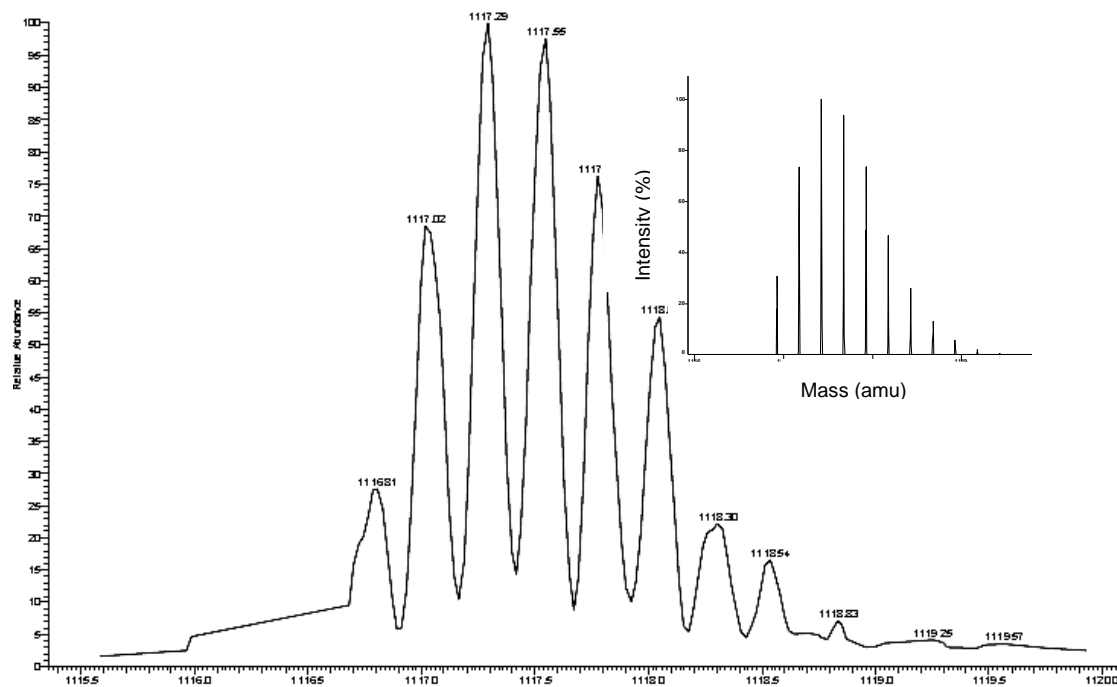

**Fig. S2** Part of the ESI mass spectrum of an equimolar mixture of **3** and TPPS in water.

The inset shows the simulated isotopic pattern for  $[3 \cdot \text{TPPS} - 4 \text{Na}]^{4+}$ .

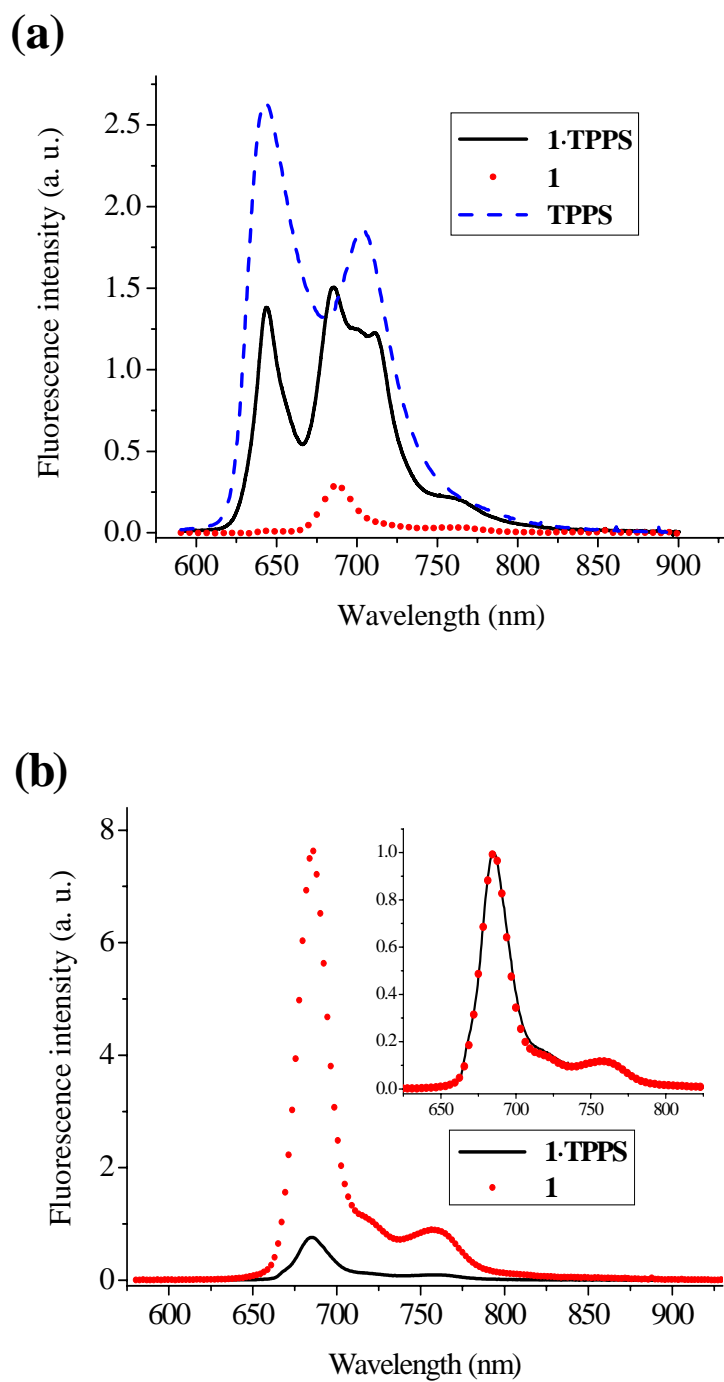

**Fig. S3** Fluorescence spectra of a 1:1 mixture of **1** and TPPS (both at 5  $\mu\text{M}$ ) in water upon (a) Por-part excitation at 415 nm or (b) Pc-part excitation at 660 nm. The inset in (b) shows the normalised spectra.

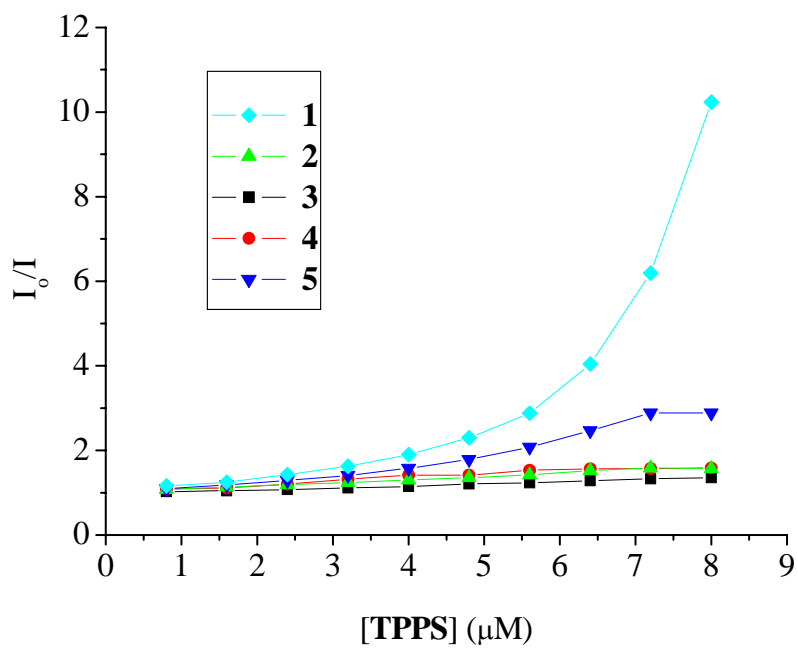

**Fig. S4** Stern-Volmer plots for the fluorescence quenching of **1-5** (5  $\mu\text{M}$ ) upon addition of TPPS in water.

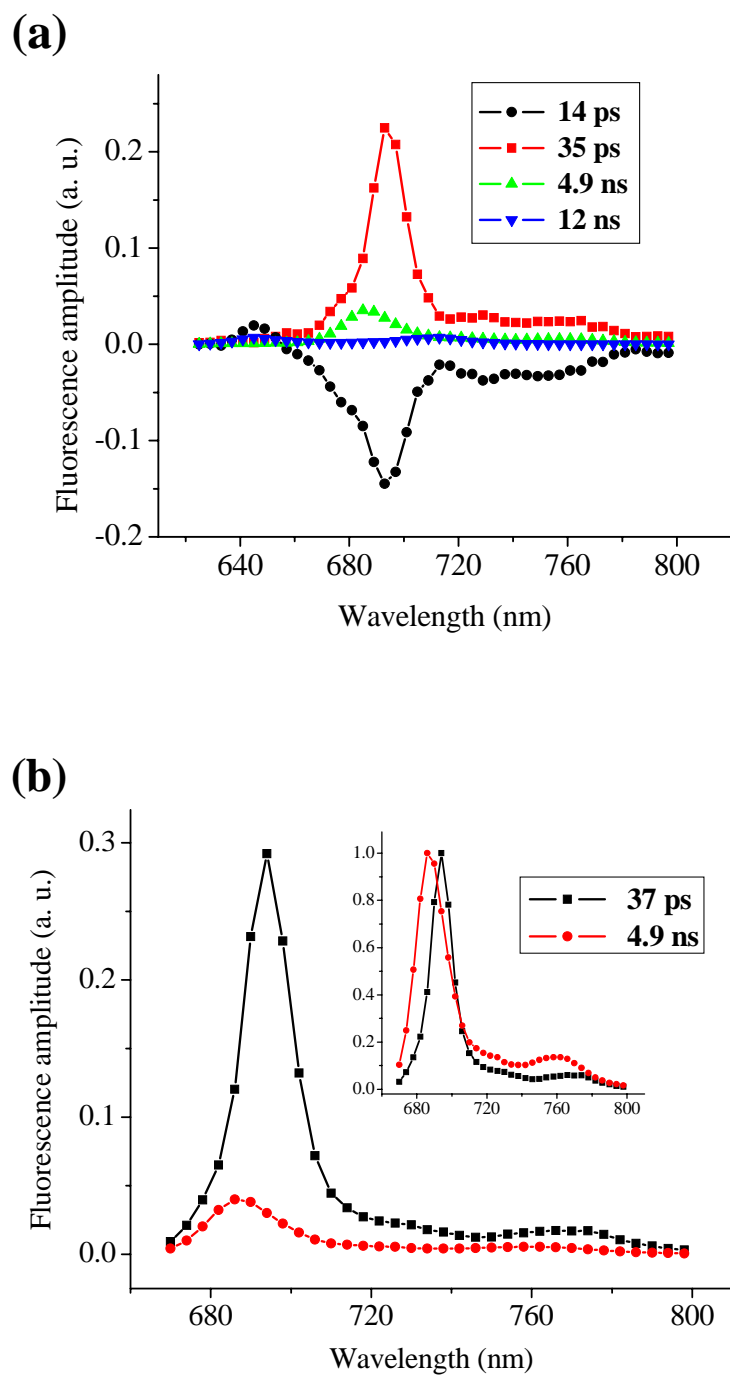

**Fig. S5** DAF spectra of a 1:1 mixture of **1** and TPPS (both at 5  $\mu$ M) in water upon (a) Por-part excitation at 532 nm or (b) Pc-part excitation at 615 nm. The inset in (b) shows the normalised spectra.

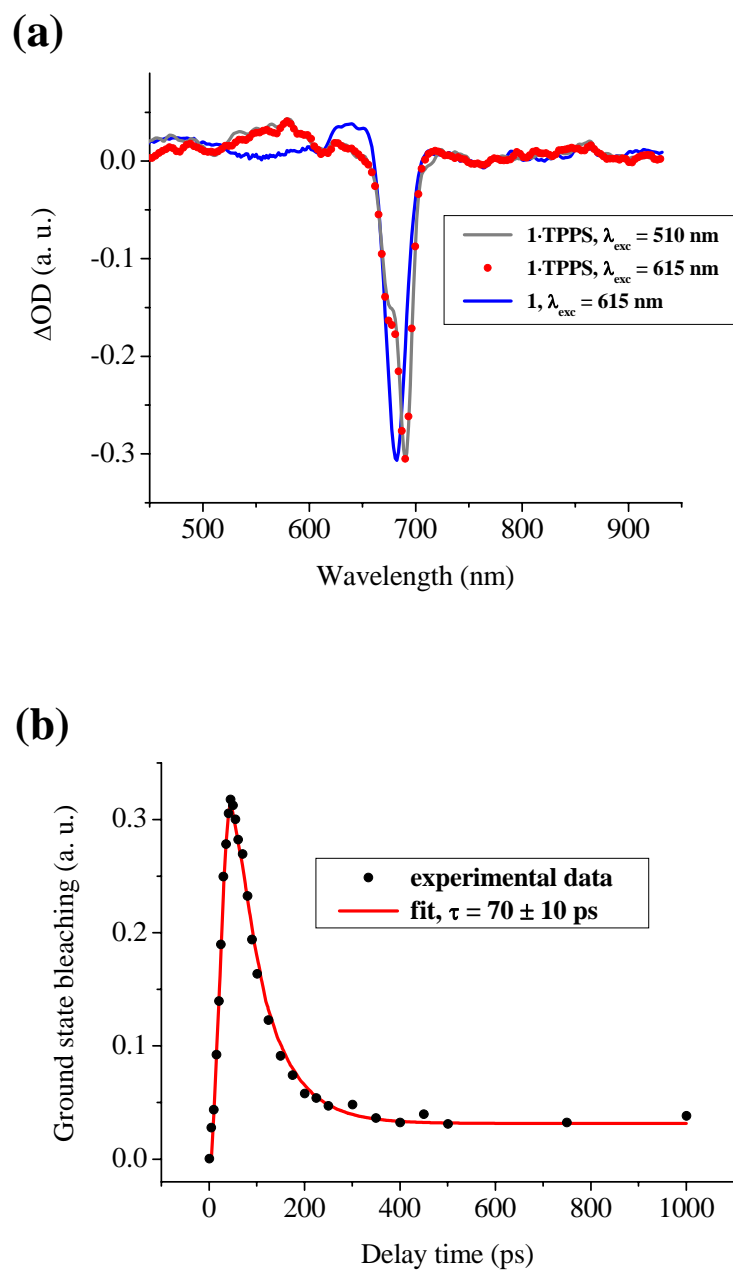

**Fig. S6** (a) Transient absorption spectra of **1** and its 1:1 mixture with TPPS in water and (b) recovery of the phthalocyanine ground state bleaching after photoexcitation of the complex.
